# Supplementary material for: Intracranial and Extracranial Progression and Their Correlation With Overall Survival After Stereotactic Radiosurgery in a Multi-institutional Cohort With Brain Metastases
Source: PubMed Central journal article supplement (PMC10134007; doi:10.1001/jamanetworkopen.2023.10117), 2023-04-26
Supplement: jamanetwopen-e2310117-s001.pdf [file jamanetwopen-e2310117-s001.pdf]

## Supplementary Online Content

Carpenter DJ, Leng J, Arshad M, et al. Intracranial and extracranial progression and their correlation with overall survival after stereotactic radiosurgery in a multi-institutional cohort with brain metastases. *JAMA Netw Open*. 2023;6(4):e2310117. doi:10.1001/jamanetworkopen.2023.10117

**eFigure.** Correlation of Overall Survival (OS) to Time to Intracranial Progression (TTICP), Time to Extracranial Progression (TTECP), and Time to Any Progression (TTP)

**eTable.** Crude Event Rates for Death, Intracranial Progression (ICP), and Extracranial Progression (ECP) Across All Patients

This supplementary material has been provided by the authors to give readers additional information about their work.

**eFigure.** Correlation of Overall Survival (OS) to Time to Intracranial Progression (TTICP), Time to Extracranial Progression (TTECP), and Time to Any Progression (TTP)

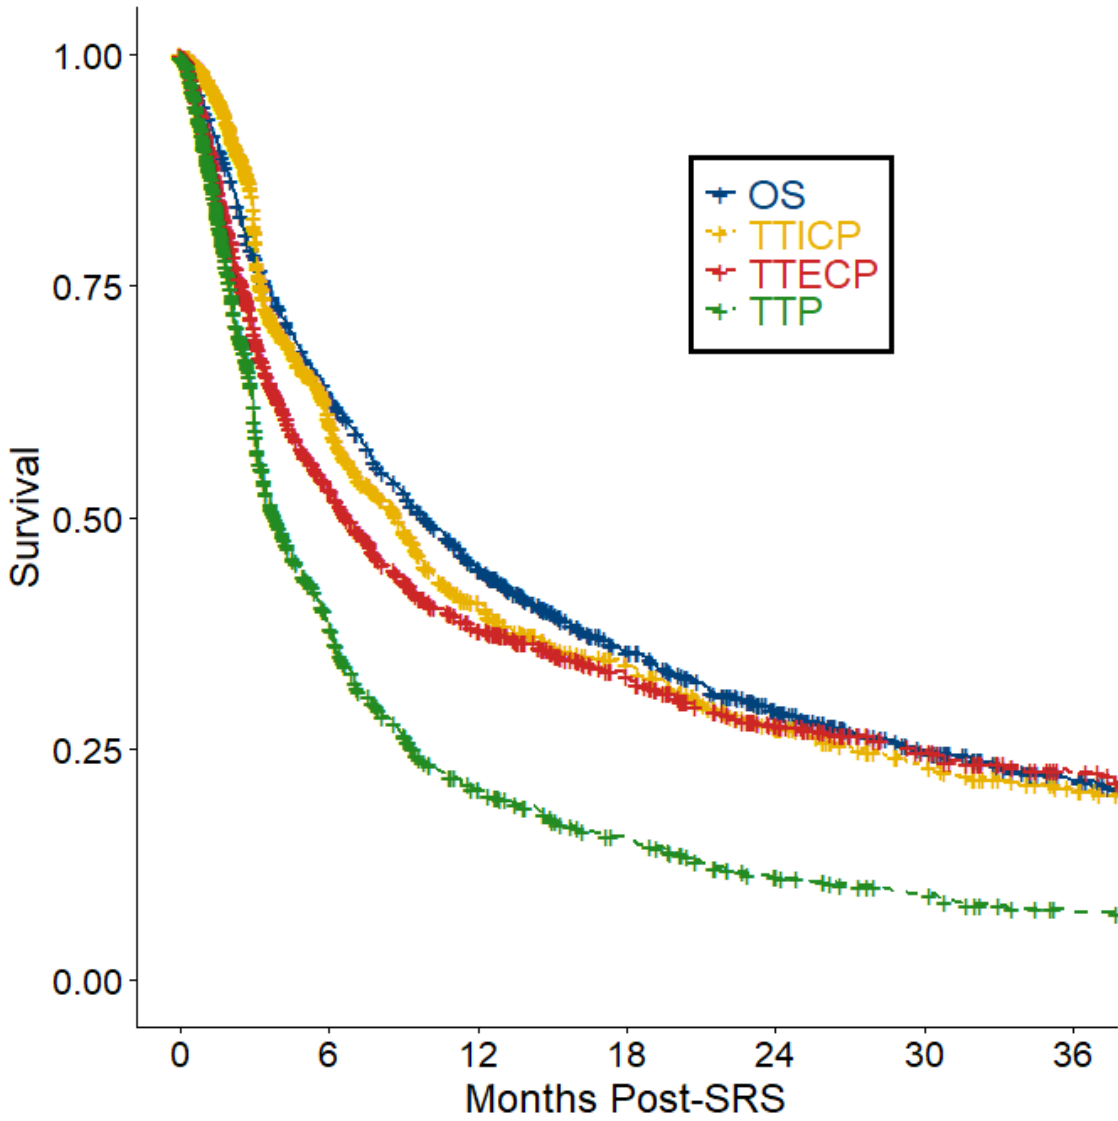

|       | Number at risk |     |     |     |     |     |     |
|-------|----------------|-----|-----|-----|-----|-----|-----|
|       | 0              | 6   | 12  | 18  | 24  | 30  | 36  |
| OS    | 1383           | 830 | 553 | 377 | 271 | 189 | 132 |
| TTICP | 1383           | 547 | 279 | 186 | 118 | 82  | 57  |
| TTECP | 1383           | 536 | 308 | 211 | 141 | 96  | 65  |
| TTP   | 1383           | 396 | 183 | 119 | 73  | 52  | 33  |

**eTable.** Crude Event Rates for Death, Intracranial Progression (ICP), and Extracranial Progression (ECP) Across All Patients

|            |     | <b>Death</b> |             |
|------------|-----|--------------|-------------|
|            |     | Yes, No. (%) | No, No. (%) |
| <b>ICP</b> | Yes | 492 (36%)    | 206 (15%)   |
|            | No  | 508 (37%)    | 177 (13%)   |
| <b>ECP</b> | Yes | 627 (45%)    | 173 (13%)   |
|            | No  | 373 (27%)    | 210 (15%)   |
| <hr/>      |     |              |             |
|            |     | <b>ICP</b>   |             |
|            |     | Yes, No. (%) | No, No. (%) |
| <b>ECP</b> | Yes | 482 (35%)    | 318 (23%)   |
|            | No  | 216 (16%)    | 367 (27%)   |
