# Supplementary material for: Intracranial and Extracranial Progression and Their Correlation With Overall Survival After Stereotactic Radiosurgery in a Multi-institutional Cohort With Brain Metastases
Source: PubMed Central journal article supplement (PMC10134007; doi:10.1001/jamanetworkopen.2023.10117), 2023-04-26
Supplement: jamanetwopen-e2310117-s002.pdf [file jamanetwopen-e2310117-s002.pdf]

## Data Sharing Statement

Carpenter. Intracranial and Extracranial Progression and Their Correlation With Overall Survival After Stereotactic Radiosurgery in a Multi-institutional Cohort With Brain Metastases. *JAMA Netw Open*. Published April 26, 2023. doi:10.1001/jamanetworkopen.2023.10117

### Data

**Data available:** No
